1       **Title: Quantification of alterations in diffusion measures of**  
2               **white matter integrity associated with healthy aging**

3

4                               Ciara J. Molloy<sup>1,2\*,#a</sup>, Sinead Nugent<sup>1,2</sup>, Arun L.W. Bokde<sup>1,2</sup>

5

6       <sup>1</sup> Cognitive Systems Group, Discipline of Psychiatry, School of Medicine, Trinity College Dublin,  
7       Dublin, Ireland

8       <sup>2</sup> Trinity College Institute of Neuroscience, Trinity College Dublin, Dublin, Ireland

9       <sup>#a</sup> Trinity Centre for Health Sciences, St. James's Hospital, Dublin, Ireland

10

11

12

13       \*Corresponding author:

14       Email: [molloycj@tcd.ie](mailto:molloycj@tcd.ie)

15

16

## 17 **Abstract**

18

19 This study aimed to evaluate the linear association of age with diffusion tensor imaging (DTI)  
20 measures of white matter such as fractional anisotropy (FA), mean diffusivity (MD), axial  
21 diffusivity (AD) and radial diffusivity (RD). We assessed patterns of overlap between linear  
22 correlations of age with FA with RD, MD and AD to characterize the process of white matter  
23 degeneration observed with ageing. 79 healthy adults aged between 18 and 75 took part in the  
24 study. The DTI data were based on 61 directions acquired with a b-value of 2000. There was a  
25 statistically significant negative linear correlation of age with FA and AD and a positive linear  
26 correlation with RD and MD, and AD. The forceps minor tract showed largest percentage of voxels  
27 with an association of age with FA, RD and AD, and the anterior thalamic radiation with MD. We  
28 found 5 main patterns of overlap: FA alone (15.95%); FA and RD (31.90%); FA and AD (12.99%);  
29 FA, RD and AD (27.37%); FA RD, and MD (6.94%). Patterns of overlap between diffusion measures  
30 may reflect underlying biological changes with healthy ageing such as loss of myelination, axonal  
31 damage, as well as mild microstructural and chronic white matter impairments. This study may  
32 provide information about causes of degeneration in specific regions of the brain, and how this  
33 may affect healthy brain functioning in older adults.

## 34 Introduction

35

36 Diffusion tensor imaging (DTI) is a neuroimaging technique, which allows for non-invasive,  
37 in vivo, investigation of white matter [1-3]. DTI measures are based on random motion of water  
38 molecules, where within the brain diffusion of water is less restricted, or more isotropic, in areas  
39 of grey matter and CSF, and more restricted, or more anisotropic, in areas of white matter. When  
40 white matter structural architecture deteriorates, water molecules within white matter tissue  
41 become more isotropic, making DTI a useful tool for assessing atrophy [4-9].

42

43 The diffusion tensor is a 3x3 covariance matrix used to model diffusion within a voxel, in  
44 which there are 3 positive eigenvalues ( $\lambda_1, \lambda_2, \lambda_3$ ) and 3 orthogonal eigenvectors ( $\epsilon_1, \epsilon_2, \epsilon_3$ ). The  
45 eigenvalues of the tensor give the diffusivity in the direction of each eigenvector. Together they  
46 describe diffusion probability using an ellipsoid, where the axes of the ellipsoid are aligned with  
47 the eigenvectors, and the major eigenvector ( $\lambda_1$ ) represents the principal diffusion direction.

48

49 Fractional anisotropy (FA), mean diffusivity (MD), radial diffusivity (RD) and axial  
50 diffusivity (AD) are the four main diffusion-based measurements of white matter structural  
51 architecture. FA measures the amount of diffusion asymmetry within a voxel, where a value of 0  
52 is isotropic and is represented by a spherical ellipsoid with equal eigenvalues, and a value of 1 is  
53 anisotropic and is represented by an elongated ellipsoid with unequal eigenvalues. FA has been  
54 associated with the microstructural integrity of white matter [10, 11]. RD is a measure of  
55 perpendicular diffusivity and is an average of the two smaller eigenvalues ( $(\lambda_2 + \lambda_3)/2$ ). RD is

56 thought to reflect myelination of white matter tracts, where an increase in RD would suggest loss  
57 of myelination [12-14], however white matter properties such as axonal diameter and density  
58 changes also affect RD [10]. AD represents parallel diffusivity and is a measure of the largest  
59 eigenvalue ( $\lambda_1$ ). AD has been linked to axonal integrity, where a decrease in AD would suggest  
60 axonal damage [15, 16]. AD decreases observed with axonal damage are thought to be caused  
61 by increases in debris from disrupted membrane barriers [17], whereas increases in AD have been  
62 suggested to reflect brain maturation [18]. However, increases in AD have also been linked to  
63 severe white matter injury when observed with changes in FA and RD [19, 20]. MD, also known  
64 as the apparent diffusion coefficient, is an average of all 3 eigenvalues in the tensor ( $(\lambda_1+\lambda_2+\lambda_3)/3$ ),  
65 and is therefore not independent of FA, RD and AD measures [10, 21]. It is thought to be a  
66 measure of membrane density. Together all four of these diffusion measures can distinguish  
67 distinct information about white matter microstructure.

68

69 The aging process coincides with changes in brain structure, brain function, and aspects  
70 of cognition such that they all decline as we get older. Many DTI studies have examined white  
71 matter structural changes that occur with aging [22-25]. Importantly, DTI studies of aging are  
72 consistent with post mortem findings of axonal and myelin damage observed in older adults,  
73 proving DTI to be a valuable in vivo measurement of white matter structural integrity [26, 27]. FA  
74 is the most commonly studied diffusion measure, and extensive decreases in FA with normal  
75 healthy aging have been reported in white matter across the brain including the body and genu  
76 of the corpus callosum (CC), the uncinate fasciculus (UF), the internal and external capsule,  
77 cingulum, fornix, the superior longitudinal fasciculus (SLF) and the inferior longitudinal fasciculus

78 (ILF) suggesting widespread alterations in white matter occur with aging [20, 28-32]. Along with  
79 FA, age-related increases in MD have been reported in the genu and splenium of the CC [28], as  
80 well as the fornix, UF [31], IFOF, SLF, and ILF [32]. RD increases have been reported in the  
81 cingulum, CC, UF and ILF in older adults compared to younger adults [20, 21, 23, 33, 34]. Age-  
82 related changes in AD are less consistent, with findings of decreases in AD in the fornix, internal  
83 capsule, midbrain and cerebellum, but also reports of increases in AD in the CC [20, 23, 33].  
84 However, other studies have also reported no changes in AD in older adults compared to younger  
85 adults [34-36], suggesting that perhaps AD changes are more subtle than RD. Further, studies  
86 showing greater RD changes compared to AD with aging indicate that myelination loss may be  
87 the main cause of degeneration of white matter with healthy aging [20, 25, 33, 34]. Longitudinal  
88 studies of older adults have shown global FA and MD changes, as well as FA, RD and AD changes  
89 in the genu of the CC within two years, suggesting that alterations in white matter can indeed  
90 occur over short periods of time with increased age [23, 37]. It has also been shown that white  
91 matter continues to mature in adulthood, with FA continuing to increase and MD continuing to  
92 decrease until between the ages of 20-42 years and 18-41 years respectively [38], stressing the  
93 importance of considering age-related changes across adulthood. Importantly maturation of  
94 white matter occurs at different rates across the brain, suggesting that perhaps the rate  
95 degeneration occurs differently in different tracts [23, 38].

96

97       Patterns of white matter changes within the brain have been examined to better  
98 understand and define the aging process, however conflicting findings have been reported. One  
99 pattern is the anterior-posterior gradient of degeneration, in which greater differences in FA in

100 frontal regions compared to posterior regions of the brain; however although studies have  
101 reported this pattern, others have found no evidence of this [23, 33, 39]. Further, studies have  
102 even reported the opposite gradient pattern of larger FA decreases in posterior regions  
103 compared to frontal regions [33, 40]. A second proposed pattern is the superior–inferior gradient  
104 of white matter degeneration which postulates that superior white matter is more vulnerable to  
105 age-related changes [31, 41]. A study by Sullivan and colleagues (2010) reported both the  
106 anterior-posterior gradient and superior-inferior gradient of age-related changes in the brain  
107 indicating that perhaps age-related white matter changes may be more complex than one  
108 gradient of degeneration. A third pattern, described as the myelodegeneration hypothesis,  
109 proposes that myelin degeneration during aging occurs in the opposite direction of development  
110 [12-14]. This pattern would therefore be consistent with age-related changes in RD in white  
111 matter fibers that are last to myelinate, such as frontal and temporal associations fibers. Davis  
112 and colleagues (2009) reported age-related RD changes in the CC, cingulum and UF, along with  
113 larger age-related RD changes compared to AD, supporting the myelodegeneration hypothesis  
114 (Davis et al. 2009). However, again another study found no evidence of this pattern of age-related  
115 degeneration [42]. The inconsistent findings across the literature further suggest that these  
116 interpretations of white matter changes may be a simplification of the aging process, highlighting  
117 the need for a more thorough understanding of age-related effects on white matter.

118

119 While studies assessing age-related changes in diffusion measures separately have been  
120 informative, a combined analyses of FA, MD, RD and AD may provide a more comprehensive  
121 understanding of the underlying biological profile of the breakdown of white matter observed

122 with aging [11, 24]. Indeed, a few studies quantifying specific patterns of changes in diffusion  
123 measures of white matter have proposed a more complex and region-specific interpretation of  
124 disruption observed with aging [20, 33]. Burzynska and colleagues (2010) quantified the  
125 frequency of overlap in age-related differences in measures of FA, RD and AD along with MD. A  
126 comparison of young and older adults established five main patterns of differences in diffusion  
127 measures observed with aging: (1) decreased FA with increased RD thought to reflect  
128 demyelination; (2) decreased FA with increased RD and MD thought to reflect chronic stages of  
129 white matter fiber degeneration; (3) decreased FA only thought to reflect mild microstructural  
130 alterations; (4) decreased FA with decreased AD thought to reflect acute axonal damage; and (5)  
131 decreased FA and AD with increased RD thought to reflect secondary Wallerian degeneration  
132 resulting in axonal loss and increased extracellular matrix tissue structures (Burzynska et al.  
133 2010). Another study comparing younger and older adults assessed the overlap between FA, RD  
134 and AD measures and found three main patterns of age-related changes in diffusion measures;  
135 (1) decreased FA with increased RD only; (2) decreased FA and AD with increased RD; and (3)  
136 decreased FA, with both increased AD and RD (Bennett et al. 2010). Another study by Zhang and  
137 colleagues (2010) of young, middle-aged and older adults also looked at the concordance and  
138 discordance of FA age-related changes with MD, and RD with AD separately [43]. Unlike the two  
139 previous studies mentioned, this study did not focus the analysis on voxels with showing  
140 significant age-related FA changes. They found (1) regions of decreased FA with increased MD  
141 increases and related it to demyelination and axonal loss, (2) regions of MD increases with no FA  
142 decreases and interpreted it as inconclusive, (3) one region with FA decreases and no MD changes  
143 and related it to Wallerian degeneration, (4) a greater change in RD than AD and suggested it

144 reflected demyelination and Wallerian degeneration, and finally (5) a one region with greater  
145 increase in AD than RD and reported this as inconclusive. These studies emphasize the  
146 importance of considering patterns of changes in diffusion measures to elucidate and define the  
147 specific profiles of age-related alterations in white matter regions across the brain.

148

149         The first goal of this study was to examine patterns of overlap between linear correlations  
150 of age with FA, RD, AD and MD in a cohort of young, middle-aged and older adults. Specifically,  
151 we quantified the frequency of patterns to establish the most prominent to least prominent  
152 pattern. Many previous studies assessing patterns of overlap between multiple diffusion  
153 measures have compared young and old adults [20, 33]. These studies have typically employed  
154 voxelwise statistical analyses of DTI data with a b-value of 1000; in the current study we used a  
155 higher b-value of 2000. We hypothesized that specific patterns of overlap between linear  
156 correlations of age with FA, RD, AD and MD would be observed, and that these different patterns  
157 may reflect specific regions of minor microstructural alterations, axonal damage, loss of  
158 myelination, and regions of more chronic white matter degeneration which are all thought to  
159 occur in aging. Examination of the patterns of overlap between linear changes in diffusion  
160 measures with age will complement previous studies examining differences between young and  
161 old.

162

163

## 164 **Materials and methods**

165



## 166 **Participants**

167  
168       Seventy-nine, right-handed participants aged between 18 and 75 years (mean = 43.9 ±  
169 18.33 SD) (male = 39) took part in the study. Exclusion criteria included permanent metallic  
170 objects in the body, a self-reported history of psychiatric or neurologic disorders or a history of a  
171 serious head injury. For participants over the age of 55 the Mini Mental State Exam (MMSE) was  
172 performed and participants with scores below 1.5 SD of the standardized scores were excluded  
173 from the study (Table 1).

174

175 **Table 1. Participant demographics.**

|              | <b>Overall</b> | <b>Young</b>  | <b>Middle</b> | <b>Older</b>  |
|--------------|----------------|---------------|---------------|---------------|
|              | <b>(n=79)</b>  | <b>(n=33)</b> | <b>(n=16)</b> | <b>(n=30)</b> |
| Age          | 43.91(18.33)   | 24.66 (5.32)  | 46.25 (5.81)  | 63.83 (4.46)  |
| Gender (M:F) | 39:39          | 18:15         | 7:9           | 14:16         |
| NART         | 33.04 (5.66)   | 32.97(5.75)   | 31.44 (5.29)  | 35.40 (6.03)  |
|              | 113.59         |               | 111.94        |               |
| NART IQ      | (4.78)         | 112.63 (3.92) | (4.84)        | 115.53 (5.09) |
| MMSE         | -              | -             | -             | 29.33 (0.76)  |
| WMH load (%) | 0.06 (0.10)    | 0.04 (0.08)   | 0.09 (0.15)   | 0.06 (0.08)   |

176 Measures are displayed as mean (±SD).

177

178           This study was approved by the Faculty of Health Sciences review board at Trinity College  
179 Dublin. Written, informed consent was obtained from all participants in accordance with the  
180 tenants of the Declaration of Helsinki. Participants were recruited through advertisements in  
181 local newspapers, church newsletters, and poster campaigns throughout universities in Dublin.

182

### 183 **MRI data acquisition**

184

185 Whole-brain high angular resolution diffusion imaging (HARDI) data were acquired on a Philips  
186 Intera Achieva 3T MRI system (Best, The Netherlands) equipped with a 32-channel head coil at  
187 Trinity College of Institute of Neuroscience, Dublin. DWI data were collected using a single-shot  
188 echo-planar imaging sequence with echo time = 81 ms, repetition time = 14,556 ms, FOV 224mm,  
189 matrix 112x112, isotropic voxel of 2x2x2 mm, 65 slices of 2 mm thickness with no gap between  
190 slices. Diffusion gradients were applied in 61 directions, with  $b = 2000 \text{ s/mm}^2$ , and four  $b = 0$   
191  $\text{s/mm}^2$  were acquired also. A 3D high resolution T1-weighted anatomical image was collected  
192 using a T1FFE (fast field echo) sequence with echo time = 3.8 ms, repetition time = 8.4 ms, FOV  
193 230mm, 0.9x0.9x0.9 mm voxel size, 180 slices, for correction of EPI-induced geometrical  
194 distortions in the data. A T2-weighted fluid-attenuated inversion recovery (FLAIR) image was  
195 collected with echo time = 120 ms, repetition time = 11000 ms, 0.45x0.45  $\text{mm}^2$  in-plane  
196 resolution, slice thickness = 5 mm, FOV = 230 mm.

197

### 198 **Estimated total intracranial volume**

199

200 FreeSurfer image analysis suite version 5.3 (<http://surfer.nmr.mgh.harvard.edu/>) was  
201 used to perform automated volumetric segmentation of the T1-weighted anatomical image and  
202 extract estimated total intracranial volume (eTIV) for white matter hyperintensity load analysis  
203 [44].

204

## 205 **White matter hyperintensity volume**

206

207 Automated segmentation of white matter hyperintensity (WMH) volume (ml) was  
208 calculated using the lesion segmentation toolbox (LST) version 2.0.15 ([www.statistical-](http://www.statistical-modelling.de/lst.html)  
209 [modelling.de/lst.html](http://www.statistical-modelling.de/lst.html)) for SPM12. T2-weighted FLAIR images were used for lesion segmentation,  
210 with T1-weighted anatomical images as a reference. Lesions were segmented using the lesion  
211 prediction algorithm, which consists of a binary classifier in the form of a logistic regression model  
212 trained on the data of 53 multiple sclerosis patients with severe lesion patterns obtained at the  
213 Department of Neurology, Technische Universität München, Munich, Germany. As covariates for  
214 this model a similar lesion belief map as for the lesion growth algorithm [45] this was used, as  
215 well as a spatial covariate that takes into account voxel specific changes in lesion probability.  
216 Parameters of this model fit are used to segment lesions in new images by providing an estimate  
217 for the lesion probability for each voxel. To describe WMH load quantitatively WMH volume was  
218 normalized by eTIV extracted from FreeSurfer analysis.

219

## 220 **Preprocessing of DWI data**

221

222 DWI data were preprocessed using ExploreDTI (v4.8.4) software ([www.exploredti.com/](http://www.exploredti.com/))  
223 (Leemans et al. 2009a). Data quality checks were performed, including visual inspection of correct  
224 orientation of gradient components and checking for gross artifacts. The data were corrected for  
225 motion correction, eddy current induced geometric distortions and for echo-planar imaging (EPI)  
226 deformations by co-registering and resampling to each subjects' T1-weighted anatomical image  
227 [46]. Correction for each of these distortions was performed in one step. The B-matrix rotation  
228 was performed within this step to reorient the data appropriately [47].The default setting of  
229 robust extraction of kurtosis indices with linear estimation (REKINDLE) approach was utilized  
230 when the tensor model was applied to the data [48].

231

## 232 **TBSS analysis**

233

234 FSL software (FMRIB Software Library- <http://www.fmrib.ox.ac.uk/fsl/>) [49] was  
235 employed to perform whole brain voxel-wise analysis of white matter using Tract Based Spatial  
236 Statistics (TBSS) [50]. FA diffusion images were extracted from diffusion data preprocessed using  
237 ExploreDTI.

238

239 A study specific template was created using all 79 subjects by aligning each subject's FA  
240 image to every other subject's FA image to identify the most representative subject. The study

241 specific template chosen was then affine aligned to MNI standard space (included in FSL software  
242 package). Every other subject's FA image was then warped into MNI space by combining the non-  
243 linear transformation to the chosen template FA image with the affine transformation to MNI  
244 space. This is done in one step to avoid resampling of the images twice. FA images from all  
245 subjects were then averaged to create the mean FA template and thinned to create a mean FA  
246 skeleton which represented the 'skeletons' of all tracts common to the group. We also  
247 investigated other diffusion measures extracted from data preprocessed in ExploreDTI such as  
248 MD, RD and AD. To do this we applied the same non-linear transformation and skeleton  
249 projection used for the FA images to the MD, RD and AD diffusion measures.

250

## 251 **Statistical Analysis**

252

253 Voxel-wise statistics were performed using the randomise permutation-based inference  
254 tool for nonparametric statistical thresholding within FSL [51]. Permutation methods were  
255 employed as they are employed when the null distribution is not known. A linear correlation of  
256 age with each diffusion measure was performed, with WMH load, the National Adult Reading  
257 Test (NART) and gender included as covariates of no interest. The NART provides an estimate  
258 measure of premorbid intelligence [52]. As intelligence and gender differences in diffusion  
259 measures of white matter have been reported, we controlled for the effects of these measures  
260 in our analysis [32, 53]. It has also been suggested that WMH should be adjusted for when  
261 examining differences in healthy white matter [54]. In our supplementary material we provide  
262 the same analysis without any covariates included to compliment previous studies (see

263 supplementary Table 1). The mean FA skeleton for the group was used as mask (thresholded to  
264 a value of 0.2) and the number of iterations was set to 10,000. The results were thresholded to a  
265 p value of <0.05 corrected for multiple comparisons across voxels using the threshold-free cluster  
266 enhancement (TFCE) option from the randomize permutation testing tool in FSL [55].

267

## 268 **Quantification of age-related white matter results**

269

270 To quantify the size of the clusters of significant age-related linear correlations with  
271 diffusion measures across the whole brain, the percentage of voxels associated with aging was  
272 calculated by dividing the number of voxels showing statistically significant linear correlations  
273 with age for FA, MD RD and AD by the total number of voxels in the mean FA skeleton.

274

275 To quantify the age-related linear correlations with diffusion measures within white  
276 matter tracts ROIs were created using the JHU Tractography atlas. Specifically, each ROI was  
277 masked, thresholded to above 10, and multiplied by the mean\_FA\_skeleton to create masks of  
278 total voxels within each tract. Statistically significant results for each diffusion measure were  
279 multiplied by tract ROIs to create masks of voxels showing linear correlations with age. The  
280 percentage of age-related voxels within tract ROIs was calculated by dividing FA, RD, AD and MD  
281 masks of linear correlations with age by the total tract masks.

282

## 283 **Quantification of overlap between diffusion measures**

284

285           The overlap between voxels showing age-related linear correlations with FA, MD, RD and  
286 AD was assessed. First the TBSS results showing significant linear correlations of age with FA, MD,  
287 RD and AD were masked. Then the FA mask was multiplied by each of the MD, RD and AD masks  
288 to create masks of the overlap between diffusion measures. The percentage of overlapping  
289 voxels was calculated by dividing each of the overlap masks by the FA mask.

290

## 291 **Results**

292

293           All statistically significant linear correlations of diffusion measures with age reported in  
294 the results include WMH load, NART scores and gender as covariates to account for any changes  
295 in diffusion measures of white matter that may be related to them.

296

### 297 **Age-related linear correlations with diffusion measures**

298

299           We quantified the age-related linear correlations in each of the diffusion metrics by  
300 calculating the percentage of voxels showing statistically significant linear correlations with age,  
301 with NART and gender included as covariates (Table 2). Age-related statistically significant  
302 negative linear correlations with FA were observed in 49.69% of white matter voxels, statistically  
303 significant positive linear correlations with RD were observed in 40.00%, statistically significant  
304 positive linear correlations with MD in 7.73%, statistically significant negative linear correlations

305 with MD were observed in 0.41%, statistically significant positive linear correlations with AD in  
 306 0.31%, and statistically significant negative linear correlations with AD in 31.53% of white matter  
 307 voxels. There were no statistically significant positive linear correlations of FA with age or  
 308 statistically negative linear correlations of RD with age.

309

310 **Table 2. Total number and percentage of voxels correlated with age, and the overlap of MD,**  
 311 **RD and AD with age-related FA voxels.**

|                                                   | FA     | FA↓    | MD↑    | MD↓   | RD↑    | AD ↑  | AD ↓   |
|---------------------------------------------------|--------|--------|--------|-------|--------|-------|--------|
| <b>skeleton</b>                                   |        |        |        |       |        |       |        |
| Total no. of voxels with age-related correlations | 128259 | 63740  | 9909   | 529   | 50015  | 398   | 40528  |
| Total % of voxels with age-related correlations*  | -      | 49.69% | 7.73%  | 0.41% | 40.00% | 0.31% | 31.53% |
| No. of voxels overlapping with FA voxels          | -      | -      | 6680   | 477   | 44967  | 134   | 27502  |
| % of voxels overlapping with FA voxels**          | -      | -      | 10.49% | 0.75% | 70.55% | 0.21% | 43.14% |

312 WMH load, NART and gender were included as covariates.

313 \* This is calculated as total number of FA/MD/AD/RD voxels correlated with age divided by total  
 314 no. of FA\_skeleton\_mask voxels.

315 \*\*This is calculated as no. of overlapping voxels divided by total no. of FA voxels.

316



317           We then assessed percentage of white matter regions affected by aging using the JHU  
318 white matter tractography atlas (Table 3). FA, RD and AD all showed the greatest percentage of  
319 voxels correlated with age in the forceps minor (90.28%, 81.73% and 71.17% respectively),  
320 whereas MD showed the greatest percentage of voxels correlated with age in the right anterior  
321 thalamic radiation (16.22%). All tracts showed some percentage of voxels with age-related linear  
322 correlations with FA and RD; however, the cingulum hippocampus showed the smallest  
323 percentage (FA: 2.71% and 2.33% for left and right respectively; RD: 0.78% and 3.10% for left and  
324 right respectively). For MD and AD, there were no voxels with age-related statistically significant  
325 positive or negative linear correlations in the cingulum hippocampus.

326

327

328

329

330

331

332

333

334

335

336  
337  
338  
339  
340  
341  
342  
343  
344  
345  
346  
347  
348  
349  
350  
351  
352  
353  
354  
355

**Table 3. Number and percentage of voxels showing age-related correlations with diffusion measures.**

| Tract                                 | Total | FA↓  | RD↑  | MD↑  | MD↓ | AD↑ | AD↓  | FA↓%   | RD↑%   | MD↑%   | MD↓%   | AD↑%  | AD↓%   |
|---------------------------------------|-------|------|------|------|-----|-----|------|--------|--------|--------|--------|-------|--------|
| Anterior Thalamic Radiation           | L     | 4463 | 2440 | 2271 | 502 | 11  | 2150 | 54.67  | 50.89  | 11.25  | 0.00   | 0.45  | 48.17  |
|                                       | R     | 4413 | 2774 | 2575 | 716 | 0   | 1875 | 62.86  | 58.35  | 16.22* | 1.40   | 0.00  | 42.49  |
| Cingulum                              | L     | 611  | 386  | 335  | 9   | 0   | 191  | 63.18  | 54.83  | 1.47   | 0.00   | 0.00  | 31.26  |
|                                       | R     | 220  | 62   | 47   | 4   | 0   | 8    | 28.18  | 21.36  | 1.82   | 0.00   | 0.00  | 3.64   |
| Hippocampus                           | L     | 258  | 7    | 2    | 0   | 0   | 0    | 2.71   | 0.78   | 0.00   | 0.00   | 0.00  | 0.00   |
|                                       | R     | 258  | 6    | 8    | 0   | 0   | 0    | 2.33   | 3.10   | 0.00   | 0.00   | 0.00  | 0.00   |
| Corticospinal                         | L     | 2559 | 1559 | 1368 | 76  | 0   | 1629 | 60.92  | 53.46  | 2.97   | 0.00   | 0.00  | 63.66  |
|                                       | R     | 2539 | 1318 | 938  | 326 | 255 | 1458 | 51.91  | 36.94  | 12.84  | 10.04* | 0.00  | 57.42  |
| Forceps Major                         | B     | 3764 | 2319 | 1869 | 261 | 0   | 701  | 61.61  | 49.65  | 6.93   | 0.00   | 0.00  | 18.62  |
| Forceps Minor                         | B     | 5698 | 5144 | 4657 | 794 | 64  | 4055 | 90.28* | 81.73* | 13.93  | 0.00   | 1.24* | 71.17* |
| Inferior Frontal Fasciculus           | L     | 4896 | 3439 | 2959 | 420 | 0   | 1549 | 70.24  | 60.44  | 8.58   | 0.00   | 0.00  | 31.64  |
|                                       | R     | 5628 | 4135 | 3744 | 710 | 0   | 2122 | 73.47  | 66.52  | 12.62  | 0.00   | 0.00  | 37.70  |
| Inferior Longitudinal Fasciculus      | L     | 3893 | 2194 | 1655 | 399 | 0   | 969  | 56.36  | 42.51  | 10.25  | 0.00   | 0.00  | 24.89  |
|                                       | R     | 3088 | 1930 | 1354 | 11  | 0   | 646  | 62.50  | 43.85  | 0.36   | 0.00   | 0.00  | 20.92  |
| Superior Longitudinal Fasciculus      | L     | 4631 | 2751 | 2239 | 29  | 0   | 195  | 59.40  | 48.35  | 0.63   | 0.00   | 0.00  | 4.21   |
|                                       | R     | 4878 | 2853 | 2488 | 444 | 0   | 494  | 58.49  | 51.00  | 9.10   | 0.00   | 0.00  | 10.13  |
| Superior Longitudinal Fasciculus Temp | L     | 2185 | 1353 | 1059 | 27  | 0   | 63   | 61.92  | 48.47  | 1.24   | 0.00   | 0.00  | 2.88   |
|                                       | R     | 2240 | 1238 | 1030 | 209 | 0   | 147  | 55.27  | 45.98  | 9.33   | 0.00   | 0.00  | 6.56   |
| Uncinate Fasciculus                   | L     | 2192 | 1346 | 1013 | 49  | 0   | 1191 | 61.41  | 46.21  | 2.24   | 0.00   | 0.00  | 54.33  |
|                                       | R     | 1183 | 661  | 434  | 141 | 0   | 642  | 55.87  | 36.69  | 11.92  | 0.00   | 0.00  | 54.27  |

WMH load, NART and gender were included as covariates. The JHU white matter tractography atlas was used to create tract ROIs.

\*This indicates the white matter tract with the largest percentage of voxels linearly correlated with age.

356 **Overlap between age-related linear correlations with diffusion**  
 357 **measures**

358

359 Within FA voxels showing significant negative age-related linear correlations, we  
 360 calculated the percentage of voxels also showing statistically significant linear correlations of age  
 361 with each of the diffusion measures of MD, RD and AD (Fig 1 and Table 4). Voxels showing  
 362 statistically significant positive age-related linear correlations with RD overlapped with 70.55%  
 363 of voxels showing statistically significant negative age-related linear correlations with FA. Positive  
 364 and negative statistically significant linear correlations with AD overlapped with 0.21% and  
 365 43.14% of voxels showing statistically significant negative age-related linear correlation FA  
 366 respectively. Positive and negative statistically significant linear correlations with MD overlapped  
 367 with 10.49% and 0.75% of voxels showing negative age-related statistically significant linear  
 368 correlations with FA respectively.

369

370 **Table 4. Total number and percentage of voxels correlated with age showing specific patterns of**  
 371 **overlap between diffusion measures.**

|               | FA↓   | FA↓&RD↑ | FA↓&AD | FA↓,AD | FA↓,AD↓, | FA↓,RD |
|---------------|-------|---------|--------|--------|----------|--------|
|               | alone | only    | ↓      | ↓&RD↑  | RD↑&MD   | ↑&MD   |
|               |       |         | only   |        | ↑        | ↑      |
| No. of voxels | 10164 | 20335   | 8283   | 17447  | 941      | 4421   |

overlapping with

---

FA voxels

---

|             |        |        |        |        |       |       |
|-------------|--------|--------|--------|--------|-------|-------|
| % of voxels | 15.95% | 31.90% | 12.99% | 27.37% | 1.48% | 6.94% |
|-------------|--------|--------|--------|--------|-------|-------|

overlapping with

FA voxels\*

---

372 WMH load, NART and gender were included as covariates.

373 \*This is calculated as no. of overlapping voxels divided by total no. of FA voxels (63740).

374

375 **Fig 1. Overlap between statistically significant linear correlations of age with FA and RD, AD**  
376 **and MD.** Age-related positive correlations with RD overlapped with 69% of age-related negative  
377 correlations with FA; AD positive correlations overlapped with 43% of FA correlations; and MD  
378 with 8%. Images are displayed in radiological convention (i.e. left=right). FA = blue; RD, AD, MD  
379 = red; Overlap = green.

380

381 We further identified 5 main patterns of overlap between diffusion measures in white  
382 matter regions showing age-related negative linear correlations with FA, and a sixth pattern in  
383 very few voxels (Fig 2 and Table 4):

384

385 **Fig 2. Patterns of overlap between diffusion measures within voxels showing age-related**  
386 **correlations with FA.** Images are displayed in radiological convention (i.e. left=right). FA alone =  
387 blue; FA & RD = pink; FA & AD = red; FA, RD&AD = green; FA, RD & MD = yellow; FA, RD, AD &  
388 MD = light blue.

389

390 1. FA and RD only pattern: statistically significant positive age-related linear correlations  
391 with RD alone showed the greatest percentage of overlapping voxels with FA across the brain  
392 (31.90%). This was the main pattern observed in the forceps major, right and left SLF, right and  
393 left ILF, right and left IFOF and right cingulum. This pattern was also observed in the right and left  
394 anterior thalamic radiation, and smaller clusters of the right and left UF, corticospinal tract, and  
395 forceps minor and body of the CC, and right anterior limb of the internal capsule.

396

397 2. FA, RD and AD pattern: statistically significant negative age-related linear correlations  
398 with AD and statistically significant positive age-related linear correlations with RD showed the  
399 second greatest percentage of overlapping voxels with FA linear correlations (27.37%). This was  
400 the main pattern observed in the forceps minor, right and left UF, right and left corticospinal  
401 tract, left posterior limb of the internal capsule, and left cres of the fornix. This pattern was also  
402 observed in a large number of voxels in the left and right IFOF, the left retrolenticular part of the  
403 internal capsule, and smaller number of voxels in the right and left ILF, SLF, and the forceps major.

404

405 3. FA only pattern: statistically significant negative age-related linear correlations with FA  
406 alone showed the third greatest percentage of overlapping voxels (15.95%). This was not the  
407 main pattern in any tract ROI. It was observed in the right and left SLF and temporal SLF, as well  
408 as small regions of the right and left anterior thalamic radiation, cingulum, forceps major and  
409 minor (body and left splenium of the CC), right and left IFOF, ILF and UF, right internal capsule  
410 and the left external capsule.

411

412 4. FA and AD pattern: The fourth pattern observed was age-related statistically significant  
413 negative linear correlations with AD and FA (12.99%). This was the main pattern observed in the  
414 right UF along with the FA, AD and RD pattern. It was also observed in clusters of the forceps  
415 major and minor, right and left anterior thalamic radiation, right and left corticospinal tract, right  
416 and left IFOF, right and left ILF as well as the right SLF and left UF, small clusters of the of the right  
417 external capsule, and the retrolenticular part of the right internal capsule, as well as right and left  
418 internal capsule.

419  
420 5. FA, RD and MD pattern: The fifth pattern observed was age-related statistically significant  
421 positive linear correlations with RD and MD, with statistically significant negative linear  
422 correlations with FA (6.94%). This pattern was the main pattern in the fornix (column and body).  
423 It was also found in small regions of the forceps minor (also genu and body of the CC), and the  
424 right and left anterior thalamic radiation, right anterior IFOF and posterior IFOF/ILF, right  
425 corticospinal tract, forceps major, right and left SLF, and right and left anterior thalamic radiation.

426  
427 6. FA, RD, AD, and MD pattern: The sixth pattern observed was age-related statistically  
428 significant negative linear correlation with FA and AD, with statistically significant positive linear  
429 correlations with MD and RD 1.48%). This pattern was found in a small cluster of voxels in the  
430 right IFOF, right and left UF, the forceps minor and body of CC, and right SLF.

431  
432 **Discussion**

433

## 434 **General findings**

435

436           This study aimed to quantify the linear effect of age on FA, RD, AD and MD diffusion  
437 measures of white matter integrity in a cohort of young, middle aged and older healthy adults,  
438 after adjusting for white matter hyperintensity (WMH) load, premorbid IQ (NART) and gender.  
439 Our findings showed negative linear correlations of age with FA and AD, as well as MD in a small  
440 number of voxels. We also found a positive linear correlation of age with MD and RD, as well as  
441 AD in a small number of voxels.

442

443           The findings of negative correlations of FA with healthy aging in many regions of the brain  
444 is in accordance with decreased FA in older adults compared to younger adults in many previous  
445 studies [21, 23-25, 29, 33, 39, 56]. When we quantified the number of voxels linearly correlated  
446 with age our findings showed that FA was statistically significant correlated with age in  
447 approximately half of the brain's white matter, higher than all other diffusion measures. This was  
448 similar to the findings from a study by Burzynska and colleagues (2010) showing age-related  
449 decreases in FA in 53% of voxels. We further showed that the tract with the highest percentage  
450 of voxels showing age-related linear correlations with FA was the forceps minor, which was also  
451 true for RD and AD, suggesting that this tract may be greatly affected by typical aging.  
452 Interestingly age-related associations with FA were found in approximately 50% of voxels or more  
453 in all tracts except the right cingulum, and the right and left cingulum hippocampus, which is

454 consistent with the parahippocampal segment of the cingulum. This points to generally extensive  
455 global effects of healthy aging on white matter integrity. The small number of voxels showing  
456 associations of age with FA and RD in the hippocampal branch of the cingulum, and the lack of  
457 any association with AD or MD indicates this region of white matter is less affected than other  
458 white matter tracts. Similar to our findings, a study comparing young and older healthy adults  
459 found differences in the subgenual branch of the cingulum but no change in any diffusion  
460 measures in the parahippocampal segment of the cingulum [57].

461  
462 Our analysis revealed a larger percentage of voxels showing linear correlations of age with  
463 RD (positive = 40.00%; negative = 0%) than with AD (positive = 0.31%; negative = 31.53%) and  
464 MD (positive = 7.73%; negative = 0.41%) indicating more widespread changes in RD across the  
465 brain with aging. In line with our initial findings, greater changes in RD compared to AD with aging  
466 has been reported previously suggesting that healthy aging is more affected by myelination loss  
467 than axonal damage across the brain [20, 33, 34, 43].

468  
469 Unlike Burzynska and colleagues (2010) we found only a small number of voxels with  
470 negative linear correlations of age with MD. However, this is a less consistent finding in the  
471 literature, with more studies reporting an increase in MD with aging [21, 28, 31, 32]. We also  
472 found a small number of voxels showing a positive linear correlation of age with AD. Both  
473 increases and decreases of AD with age have been reported [20, 23, 33, 57]. Animal studies have  
474 attributed decreases in AD to acute axonal injury [13, 58]. Human diffusion studies have observed  
475 AD increases with traumatic brain injury, resulting in more chronic and irreversible white matter



476 damage [59]. Taking this into account, perhaps the cohort in the current study had less chronic  
477 axonal damage than previous studies. However, another explanation for AD increases may be  
478 due to loss of fiber coherence in regions of crossing fibers, which is a common issue with the  
479 diffusion tensor model [60].

480  
481 To further inform age-related changes in white matter integrity we next assessed patterns  
482 of overlap between diffusion measures significantly linearly correlated with age. Specifically, we  
483 examined patterns only within voxels showing significant negative linear correlations of age with  
484 FA. That RD overlapped with ~70% and AD with ~43% of voxels showing age-related linear  
485 correlations with FA, is indicative of a strong association of both RD and AD with aging in our  
486 cohort. The greater percentage of overlap between FA and RD than FA and AD, further suggests  
487 that loss of myelination may be a major contributor to degeneration observed with healthy aging  
488 [33, 34].

489  
490 While our results showed multiple patterns of overlapping diffusion measures within  
491 tracts, a main pattern was observed for most tracts. Multiple patterns of overlap within tracts  
492 may reflect vulnerability in specific regions of the brain, rather than white matter tracts as a  
493 whole. It is also possible that examination of patterns of overlap reveals regions of white matter  
494 tracts showing different stages of white matter changes observed with aging, or simply that  
495 perhaps degeneration is not consistent across the brain, which would not be surprising given that  
496 some studies have suggested different gradients of changes in diffusion of white matter integrity  
497 with aging [31, 34, 61]. However, given that a main pattern was observed in many tracts including

498 the forceps minor, forceps major, left and right SLF and ILF, our findings suggest there may be a  
499 specific profile of age-related changes in major white matter fiber bundles.

500

## 501 **The FA and RD pattern**

502

503 The most prominent pattern observed was a linear correlation of age with FA and RD, but not  
504 AD, which has been thought to reflect mainly the process of myelination loss in white matter  
505 tracts [13, 14, 20, 33]. Histology investigations have indicated that white matter atrophy is a  
506 major causal factor of brain degeneration with aging, supporting DTI studies [27]. Further, loss of  
507 myelination in the CC, a highly myelinated white matter bundle, for which the genu and splenium  
508 sub regions are consistent with the forceps major and minor respectively, has been shown in  
509 older adults [27]. Consistent with this, in the current study the FA and RD pattern was largely  
510 observed in the forceps major, along with the IFOF, ILF and SLF. Similarly, Burzynska and  
511 colleagues' (2010) study comparing older and younger adults also reported this pattern as the  
512 dominant pattern in forceps major [20].

513

514 Differences in white matter integrity in the SLF with aging have been reported previously  
515 [62], as well as the FA and RD pattern of age-related changes in the SLF [33]. Although the FA and  
516 RD pattern was the prominent pattern in the SLF, it should be noted that we also found voxels  
517 showing the FA alone pattern in both the left and right SLF as well as the FA, AD and RD pattern  
518 and FA, RD and MD pattern in a small number of voxels of the right SLF.

519

520 For the ILF and IFOF findings, it is important to note that they are known to overlap partly,  
521 so diffusion measures may not distinguish between these tracts very well along some regions  
522 [63]. We also found some clusters of voxels within both tract ROIs showing other patterns.  
523 Previous studies of age-related changes in the IFOF are mixed. One previous study examining  
524 frontal lobe white matter connections, did not find age-related linear correlations with diffusion  
525 measures in this tract [62]. However, differences in FA have been reported in older adults  
526 compared to young [31, 32, 64]. It is possible that these discrepancies across studies may reflect  
527 differences in DTI acquisition parameters or analysis techniques. Overall, it seems that loss of  
528 myelination may indeed explain a large proportion of white matter degeneration observed with  
529 aging.

530

### 531 **The FA, RD and AD pattern**

532

533 The FA, RD and AD pattern has been linked to axonal damage, gliosis and subsequent  
534 increases in extracellular tissue structures [3, 20]. While decreases in AD have been reported in  
535 studies of ischemic stroke, which have been suggested to result in gliosis. This was the main  
536 pattern in many tracts with frontal lobe connections such as the forceps minor, anterior thalamic  
537 radiation, UF, and a large proportion of the IFOF, as well as other white matter fibers such as the  
538 corticospinal tract and the cres of the fornix, and cingulum.

539

540 The frontal lobes have been suggested to be sensitive to aging [20, 33, 41]. Although  
541 studies have indicated that frontal regions may be more vulnerable to age-related decline than

542 posterior regions [41], a longitudinal study assessing rate of change in diffusion measures did not  
543 find evidence of the anterior-posterior gradient over a 2-year period [23]. Our findings of  
544 widespread age-related degeneration in white matter, with multiple patterns across the brain  
545 also indicate that the pattern of degeneration may be more complicated. For example, although  
546 the FA, RD and AD pattern was the main pattern in the UF, some voxels showed the FA and RD  
547 pattern, as well as the FA and AD pattern. Interestingly, a previous study assessed diffusion  
548 measures separately and found changes in FA, RD, AD and MD with aging in the UF, suggesting  
549 that an overlap in age-related changes could have also been observed in the UF [31].

550

551 The cingulum, which connects the frontal lobe with parietal and temporal regions such as  
552 the hippocampus and parahippocampus, showed the FA, RD and AD pattern in the right and left  
553 cingulum, as well as a similar number of voxels with the FA and RD pattern in the left cingulum  
554 [65-67]. However, only a very small number of voxels within the cingulum hippocampus ROI were  
555 associated with aging suggesting that this tract was not affected by age. Other studies have also  
556 observed differences in FA and RD only in parts of the cingulum, such as the superior portion but  
557 not posterior or inferior region [31], and the subgenual branch but not the parahippocampal  
558 segment of the cingulum [57].

559

560 This FA, RD and AD pattern was also reported in the crus of the fornix by a previous study  
561 comparing younger and older adults, suggesting this small white matter structure is vulnerable  
562 to healthy aging possibly due to axonal damage and gliosis [20]. Our findings suggest that axonal

563 damage and increases in extracellular matrix tissues may be another major cause of brain white  
564 matter changes that occur with the normal healthy aging process.

565

## 566 **The FA alone pattern**

567

568 The FA alone pattern has been suggested to reflect mild microstructural changes, such as  
569 fiber structure loss without any major tissue loss, where these decreases in FA in the absence of  
570 MD increases may be due to subtle changes in RD and AD [20, 43]. Although this pattern was  
571 observed throughout the brain, it was not the most prominent pattern in any white matter tract.  
572 This indicates that FA overlapped with other diffusion measures in a large proportion of voxels  
573 showing age-related linear correlations. Consistent with the straight gyrus reported by Burzynska  
574 and colleagues (2010), we also observed the FA alone pattern in the inferior frontal gyrus. Overall  
575 the current study findings suggest that these less severe microstructural changes occur across  
576 the brain with aging. The fact that FA showed the largest percentage of affected voxels, indicates  
577 that perhaps FA alone mild may changes occur first, may then be followed by changes and/or  
578 greater changes in other diffusion measures. Future studies comparing young and middles aged  
579 adults or longitudinal designs are needed to investigate this further.

580

## 581 **The FA and AD pattern**

582

583           The FA and AD pattern was the fourth pattern we observed which has been linked to  
584 acute axonal damage, such as axon swelling and fragmentation, and therefore distinguishing it  
585 from the FA, RD and AD pattern [20]. Although this pattern was observed in a proportion of voxels  
586 in many tract ROIs, it was not the dominant pattern in any tract. This indicates that correlations  
587 of AD with age were mainly observed in conjunction with FA and RD, and not with FA alone. This  
588 would not be surprising given that most studies to date show greater RD changes than AD, and  
589 oThis pattern was previously reported by Burzynska and colleagues (2010), who also showed  
590 some areas of overlap with MD within this pattern. Interestingly, another study did not report  
591 this pattern, but instead only observed AD changes in conjunction with FA and RD, further  
592 suggesting it is not a common pattern associated with the aging brain [33].

593

## 594 **The FA, RD and MD pattern**

595

596           The pattern of FA, RD and MD has been suggested to reflect chronic white matter fiber  
597 degeneration [20]. This pattern has been observed in While earlier studies have reported  
598 differences in all of three of these measures with aging, few have assessed their specific regional  
599 overlap [20, 31, 64]. Findings from our study indicated that chronic WM degeneration was  
600 observed in the CC, mainly in the regions of the body and genu as well as the body of the fornix.  
601 Diffusion imaging studies have consistently reported white matter structural changes in the CC  
602 with aging, particularly in the genu and body [20, 31, 33, 34, 62]. The CC is important for  
603 interhemispheric communication, therefore chronic white matter impairments in this white  
604 matter bundle could result in deficits in cognitive functions requiring cross communication

605 between hemispheres [68]. For example, many functional MRI studies have shown bilateral  
606 activation in older adults compared to unilateral activation observed in younger adults, which  
607 has been suggested to be a compensatory mechanism for declining networks and additional brain  
608 recruitment for task performance [69-73]. It is plausible that this bilateral functional activation  
609 often reported within frontal lobes in older adults may result from white matter alterations in  
610 the CC affecting inter-hemispheric communication.

611  
612 The fornix has previously been reported to show age-related structural changes [20, 31,  
613 61, 74]. In contrast to our findings, a previous study found an overlap between FA, RD and MD  
614 along with increases in AD in the body of the fornix [20], and another study that only assessed  
615 FA, RD and AD, also found an overlap between all three measures in the fornix. It is important  
616 to note that the fornix is located close to the ventricles, so measures within this structure may  
617 be influenced by cerebrospinal fluid pulsation [74].

618  
619 Although we found this pattern in some other white matter brain regions, again it was  
620 not the main pattern, suggesting that chronic white matter degeneration is not linearly changing  
621 across the brain with healthy aging.

622  
623 **White matter hyperintensity load**

624  
625 A recent study by Svärd and Colleagues (2017) showed that WMH load can impact FA and  
626 MD measures in healthy elderly adults, and when comparing to prodromal Alzheimer's disease,

627 suggesting it may be essential to control for in any study assessing age effects on diffusion  
628 measures of white matter [54]. Given that WMH load increases are observed with aging, it is  
629 possible that some white matter differences between young and older healthy adults may be  
630 attributable to disparate WMH load [75, 76]. Therefore, it may be important to measure WMH  
631 load when assessing healthy aging, as well as neurodegenerative diseases to better understand  
632 white matter changes that are specific to “normal appearing white matter”, and not driven by  
633 white matter hyperintensities [54]. We performed the analysis in the same cohort without  
634 including WMH load as a covariate (i.e. only NART and gender covariates were included in  
635 correlation analysis) and found that adjusting for WMH load did not affect the results greatly in  
636 this study. For this analysis one extra subject was included ( $n = 80$ ; mean age =  $43.65 \pm 18.36$  SD),  
637 and the percentage of voxels correlated with age were minimally affected for each diffusion  
638 measure: FA (positive = 0%; negative = 50.17%), RD (positive = 39.01%; negative = 0%), MD  
639 (positive = 6.11%; negative = 0%) and AD (positive = 0.03%; negative = 31.63%) (see S1 Table).  
640 The main difference was that no negative correlations of age with MD were observed. The  
641 patterns of overlap, and percentages were also largely maintained (see S2 Table). It is worth  
642 noting that with the exception of one subject, all WMH loads were in the lower range for all  
643 subjects suggesting that our older adults were indeed healthy, and that perhaps subtler effects  
644 would be expected in the current cohort. Nevertheless, few studies have taken WMH load into  
645 account when assessing aging, and to our knowledge, none have assessed its effect on  
646 percentages of voxels linearly associated with age or patterns of overlap between diffusion  
647 measures. It is possible that discrepancies within aging studies may be accounted for, or at least  
648 partially explained by white matter hyperintensity load effects on DTI measures. Future studies



649 of aging, or age-related diseases are needed to confirm the extent to which WMH load effects  
650 DTI measures in various tracts throughout the brain.

651

## 652 **DTI data acquisition insights**

653

654 In the literature to date many TBSS studies of aging have used b-values of less than 1500,  
655 and the two main studies we compared to by Burzynska and colleagues (2010), and Bennett and  
656 colleagues (2010) both used b-values of 1000, whereas this study utilized diffusion weighted data  
657 with a b-value of 2000. Increasing the b-value can be advantageous; for example, it increases the  
658 brightness of white matter which may be beneficial to segmentation of gray and white matter  
659 [77]. An increase in b-value from 1000 to 3000 has also been shown to result in noisier images,  
660 loss of signal, and hyperintense white matter compared to gray matter [78]. The findings from  
661 this study of statistically significant negative linear correlations of age with FA are consistent with  
662 the literature, as well as the linear correlations with RD and AD. However, some dissimilar  
663 findings were found, mainly with MD. It has been shown that increases in the b-value results in  
664 decreases in the apparent diffusion coefficient but not FA measures, and changes in the diffusion  
665 properties of gray and white matter [77, 79]. Discrepancies between studies may indeed be  
666 explained by differences in data acquisition parameters. Further research focusing on differences  
667 in scan acquisition and analysis techniques is needed to test this specifically. Overall, this study  
668 found that a b-value of 2000 is still sensitive to detection of age-related changes in diffusion  
669 measures of white matter in the brain, using a widely used analysis method. We also found very  
670 similar patterns of overlap between FA, RD and AD diffusion parameters, observed in previous

671 studies. Any discrepancies may be in part due to differences in acquisition parameters and/or  
672 various processing and analysis techniques.

673

## 674 **Limitations**

675

676 DTI-based measures of axonal integrity and myelination should be interpreted with  
677 caution as these are indirect measures of white matter structural integrity. The TBSS technique  
678 also has limitations. It is known that 90% of the brain white matter consists of crossing fibers,  
679 however the diffusion tensor has difficulty in accounting for these crossing fibers [80]. Therefore,  
680 DTI measures may not be true representations of fiber integrity in regions of crossing fibers.  
681 Anatomical specificity inaccuracies of the TBSS analysis approach have also been reported, as  
682 well as image registration [81]. Despite these limitations, this analysis has been utilized by many  
683 studies. Importantly DTI studies of aging have reproduced results of post-mortem studies of the  
684 brain proving it to be a useful technique.

685

## 686 **Conclusion**

687

688 This study quantified patterns of age-related linear correlations with diffusion measures  
689 of white matter in a cohort of young, middle-aged and older adults. Overall this study found that  
690 healthy aging has a profound impact on white matter. The patterns of age-related linear  
691 correlations with diffusion measures provides crucial information about possible underlying

692 causes of degeneration of white matter, and how the various patterns of decline may be region  
693 specific. These findings may have important implications for connectivity between brain regions  
694 and the cognitive functions they support in healthy aging. The study emphasizes the importance  
695 of considering patterns of white matter changes in DTI measures across adulthood, while  
696 controlling for variables that may affect assessment of changes white matter with healthy aging.  
697 This may help to better understand specific biological profile contributing to white matter  
698 deterioration which may influence brain function in healthy aging.

## 699 **Acknowledgments**

700

701           The authors would like to thank the participants who donated their time and energy to  
702 our research. The authors would also like to thank Sojo Josephs and the Trinity Centre for High  
703 Performance Computing (TCHPC) for their support throughout the project.

## 705 **References**

706

707 1. Bassler PJ, Pajevic S, Pierpaoli C, Duda J, Aldroubi A. In vivo fiber tractography using DT-MRI data.

708 Magnetic resonance in medicine. 2000;44(4):625-32.

709 2. Bassler PJ, Pierpaoli C. Microstructural and physiological features of tissues elucidated by

710 quantitative-diffusion-tensor MRI. J Magn Reson B. 1996;111(3):209-19.

711 3. Pierpaoli C, Jezzard P, Bassler PJ, Barnett A, Di Chiro G. Diffusion tensor MR imaging of the

712 human brain. Radiology. 1996;201(3):637-48.

713 4. Cavado E, Lista S, Rojkova K, Chiesa PA, Houot M, Brueggen K, et al. Disrupted white matter

714 structural networks in healthy older adult APOE  $\epsilon$ 4 carriers – An international multicenter DTI study.

715 Neuroscience. 2017;357:119-33.

716 5. Fischer FU, Scheurich A, Wegrzyn M, Schermuly I, Bokde ALW, Klöppel S, et al. Automated

717 tractography of the cingulate bundle in Alzheimer's disease: A multicenter DTI study. Journal of

718 Magnetic Resonance Imaging. 2012;36(1):84-91.

719 6. Cherubini A, Peran P, Spoletini I, Di Paola M, Di Iulio F, Hagberg GE, et al. Combined volumetry

720 and DTI in subcortical structures of mild cognitive impairment and Alzheimer's disease patients. Journal

721 of Alzheimer's disease : JAD. 2010;19(4):1273-82.

722 7. Inglese M, Bester M. Diffusion imaging in multiple sclerosis: research and clinical implications.

723 NMR in biomedicine. 2010;23(7):865-72.

724 8. Keil C, Prell T, Peschel T, Hartung V, Dengler R, Grosskreutz J. Longitudinal diffusion tensor

725 imaging in amyotrophic lateral sclerosis. BMC neuroscience. 2012;13:141-.

726 9. O'Dwyer L, Lamberton F, Bokde ALW, Ewers M, Faluyi YO, Tanner C, et al. Multiple Indices of

727 Diffusion Identifies White Matter Damage in Mild Cognitive Impairment and Alzheimer's Disease. PLOS

728 ONE. 2011;6(6):e21745.

- 729 10. Alexander AL, Hurley SA, Samsonov AA, Adluru N, Hosseinbor AP, Mossahebi P, et al.  
730 Characterization of cerebral white matter properties using quantitative magnetic resonance imaging  
731 stains. *Brain Connect.* 2011;1(6):423-46.
- 732 11. Assaf Y, Pasternak O. Diffusion tensor imaging (DTI)-based white matter mapping in brain  
733 research: a review. *Journal of molecular neuroscience : MN.* 2008;34(1):51-61.
- 734 12. Schmierer K, Scaravilli F, Altmann DR, Barker GJ, Miller DH. Magnetization transfer ratio and  
735 myelin in postmortem multiple sclerosis brain. *Annals of neurology.* 2004;56(3):407-15.
- 736 13. Song SK, Sun SW, Ju WK, Lin SJ, Cross AH, Neufeld AH. Diffusion tensor imaging detects and  
737 differentiates axon and myelin degeneration in mouse optic nerve after retinal ischemia. *NeuroImage.*  
738 2003;20(3):1714-22.
- 739 14. Song SK, Sun SW, Ramsbottom MJ, Chang C, Russell J, Cross AH. Dysmyelination revealed  
740 through MRI as increased radial (but unchanged axial) diffusion of water. *NeuroImage.* 2002;17(3):1429-  
741 36.
- 742 15. Budde MD, Kim JH, Liang HF, Schmidt RE, Russell JH, Cross AH, et al. Toward accurate diagnosis  
743 of white matter pathology using diffusion tensor imaging. *Magnetic resonance in medicine.*  
744 2007;57(4):688-95.
- 745 16. Glenn OA, Henry RG, Berman JI, Chang PC, Miller SP, Vigneron DB, et al. DTI-based three-  
746 dimensional tractography detects differences in the pyramidal tracts of infants and children with  
747 congenital hemiparesis. *Journal of magnetic resonance imaging : JMRI.* 2003;18(6):641-8.
- 748 17. Sun SW, Liang HF, Le TQ, Armstrong RC, Cross AH, Song SK. Differential sensitivity of in vivo and  
749 ex vivo diffusion tensor imaging to evolving optic nerve injury in mice with retinal ischemia.  
750 *NeuroImage.* 2006;32(3):1195-204.

- 751 18. Ashtari M, Cervellione KL, Hasan KM, Wu J, McIlree C, Kester H, et al. White matter  
752 development during late adolescence in healthy males: a cross-sectional diffusion tensor imaging study.  
753 *NeuroImage*. 2007;35(2):501-10.
- 754 19. Sidaros A, Engberg AW, Sidaros K, Liptrot MG, Herning M, Petersen P, et al. Diffusion tensor  
755 imaging during recovery from severe traumatic brain injury and relation to clinical outcome: a  
756 longitudinal study. *Brain*. 2008;131(Pt 2):559-72.
- 757 20. Burzynska AZ, Preuschhof C, Backman L, Nyberg L, Li SC, Lindenberger U, et al. Age-related  
758 differences in white matter microstructure: region-specific patterns of diffusivity. *NeuroImage*.  
759 2010;49(3):2104-12.
- 760 21. Bennett IJ, Madden DJ. Disconnected aging: cerebral white matter integrity and age-related  
761 differences in cognition. *Neuroscience*. 2014;276:187-205.
- 762 22. Malloy P, Correia S, Stebbins G, Laidlaw DH. Neuroimaging of white matter in aging and  
763 dementia. *The Clinical neuropsychologist*. 2007;21(1):73-109.
- 764 23. Barrick TR, Charlton RA, Clark CA, Markus HS. White matter structural decline in normal ageing:  
765 a prospective longitudinal study using tract-based spatial statistics. *NeuroImage*. 2010;51(2):565-77.
- 766 24. Madden DJ, Bennett IJ, Burzynska A, Potter GG, Chen NK, Song AW. Diffusion tensor imaging of  
767 cerebral white matter integrity in cognitive aging. *Biochim Biophys Acta*. 2012;1822(3):386-400.
- 768 25. Madden DJ, Bennett IJ, Song AW. Cerebral white matter integrity and cognitive aging:  
769 contributions from diffusion tensor imaging. *Neuropsychol Rev*. 2009;19(4):415-35.
- 770 26. Tang Y, Nyengaard JR, Pakkenberg B, Gundersen HJ. Age-induced white matter changes in the  
771 human brain: a stereological investigation. *Neurobiology of aging*. 1997;18(6):609-15.
- 772 27. Meier-Ruge W, Ulrich J, Bruhlmann M, Meier E. Age-related white matter atrophy in the human  
773 brain. *Ann N Y Acad Sci*. 1992;673:260-9.

- 774 28. Sullivan EV, Pfefferbaum A. Neuroradiological characterization of normal adult ageing. Br J  
775 Radiol. 2007;80 Spec No 2:S99-108.
- 776 29. Nusbaum AO, Tang CY, Buchsbaum MS, Wei TC, Atlas SW. Regional and global changes in  
777 cerebral diffusion with normal aging. AJNR Am J Neuroradiol. 2001;22(1):136-42.
- 778 30. O'Sullivan M, Jones DK, Summers PE, Morris RG, Williams SC, Markus HS. Evidence for cortical  
779 "disconnection" as a mechanism of age-related cognitive decline. Neurology. 2001;57(4):632-8.
- 780 31. Zahr NM, Rohlfing T, Pfefferbaum A, Sullivan EV. Problem solving, working memory, and motor  
781 correlates of association and commissural fiber bundles in normal aging: a quantitative fiber tracking  
782 study. NeuroImage. 2009;44(3):1050-62.
- 783 32. Cox SR, Ritchie SJ, Tucker-Drob EM, Liewald DC, Hagenaars SP, Davies G, et al. Ageing and brain  
784 white matter structure in 3,513 UK Biobank participants. Nat Commun. 2016;7:13629.
- 785 33. Bennett IJ, Madden DJ, Vaidya CJ, Howard DV, Howard JH, Jr. Age-related differences in multiple  
786 measures of white matter integrity: A diffusion tensor imaging study of healthy aging. Hum Brain Mapp.  
787 2010;31(3):378-90.
- 788 34. Davis SW, Dennis NA, Buchler NG, White LE, Madden DJ, Cabeza R. Assessing the effects of age  
789 on long white matter tracts using diffusion tensor tractography. NeuroImage. 2009;46(2):530-41.
- 790 35. Madden DJ, Spaniol J, Costello MC, Bucur B, White LE, Cabeza R, et al. Cerebral white matter  
791 integrity mediates adult age differences in cognitive performance. J Cogn Neurosci. 2009;21(2):289-302.
- 792 36. Zhong WJ, Guo DJ, Zhao JN, Xie WB, Chen WJ, Wu W. Changes of axial and radial diffusivities in  
793 cerebral white matter led by normal aging. Diagn Interv Imaging. 2012;93(1):47-52.
- 794 37. de Groot M, Cremers LG, Ikram MA, Hofman A, Krestin GP, van der Lugt A, et al. White Matter  
795 Degeneration with Aging: Longitudinal Diffusion MR Imaging Analysis. Radiology. 2016;279(2):532-41.
- 796 38. Lebel C, Gee M, Camicioli R, Wieler M, Martin W, Beaulieu C. Diffusion tensor imaging of white  
797 matter tract evolution over the lifespan. NeuroImage. 2012;60(1):340-52.



- 798 39. Sullivan EV, Pfefferbaum A. Diffusion tensor imaging and aging. *Neurosci Biobehav Rev.*  
799 2006;30(6):749-61.
- 800 40. Salat DH, Tuch DS, Hevelone ND, Fischl B, Corkin S, Rosas HD, et al. Age-related changes in  
801 prefrontal white matter measured by diffusion tensor imaging. *Ann N Y Acad Sci.* 2005;1064:37-49.
- 802 41. Sullivan EV, Rohlfing T, Pfefferbaum A. Longitudinal study of callosal microstructure in the  
803 normal adult aging brain using quantitative DTI fiber tracking. *Dev Neuropsychol.* 2010;35(3):233-56.
- 804 42. Westlye LT, Walhovd KB, Dale AM, Bjornerud A, Due-Tonnessen P, Engvig A, et al. Life-span  
805 changes of the human brain white matter: diffusion tensor imaging (DTI) and volumetry. *Cereb Cortex.*  
806 2010;20(9):2055-68.
- 807 43. Zhang Y, Du AT, Hayasaka S, Jahng GH, Hlavin J, Zhan W, et al. Patterns of age-related water  
808 diffusion changes in human brain by concordance and discordance analysis. *Neurobiology of aging.*  
809 2010;31(11):1991-2001.
- 810 44. Buckner RL, Head D, Parker J, Fotenos AF, Marcus D, Morris JC, et al. A unified approach for  
811 morphometric and functional data analysis in young, old, and demented adults using automated atlas-  
812 based head size normalization: reliability and validation against manual measurement of total  
813 intracranial volume. *NeuroImage.* 2004;23(2):724-38.
- 814 45. Schmidt P, Gaser C, Arsic M, Buck D, Forschler A, Berthele A, et al. An automated tool for  
815 detection of FLAIR-hyperintense white-matter lesions in Multiple Sclerosis. *NeuroImage.*  
816 2012;59(4):3774-83.
- 817 46. Irfanoglu MO, Walker L, Sarlls J, Marengo S, Pierpaoli C. Effects of image distortions originating  
818 from susceptibility variations and concomitant fields on diffusion MRI tractography results. *NeuroImage.*  
819 2012;61(1):275-88.
- 820 47. Leemans A, Jones DK. The B-matrix must be rotated when correcting for subject motion in DTI  
821 data. *Magnetic resonance in medicine.* 2009;61(6):1336-49.

- 822 48. Tax CM, Otte WM, Vieregger MA, Dijkhuizen RM, Leemans A. REKINDLE: robust extraction of  
823 kurtosis INDices with linear estimation. *Magnetic resonance in medicine*. 2015;73(2):794-808.
- 824 49. Smith SM, Jenkinson M, Woolrich MW, Beckmann CF, Behrens TE, Johansen-Berg H, et al.  
825 *Advances in functional and structural MR image analysis and implementation as FSL*. *NeuroImage*.  
826 2004;23 Suppl 1:S208-19.
- 827 50. Smith SM, Jenkinson M, Johansen-Berg H, Rueckert D, Nichols TE, Mackay CE, et al. Tract-based  
828 spatial statistics: voxelwise analysis of multi-subject diffusion data. *NeuroImage*. 2006;31(4):1487-505.
- 829 51. Winkler AM, Ridgway GR, Webster MA, Smith SM, Nichols TE. Permutation inference for the  
830 general linear model. *NeuroImage*. 2014;92:381-97.
- 831 52. Bright P, Jaldow E, Kopelman MD. The National Adult Reading Test as a measure of premorbid  
832 intelligence: a comparison with estimates derived from demographic variables. *Journal of the*  
833 *International Neuropsychological Society : JINS*. 2002;8(6):847-54.
- 834 53. Dunst B, Benedek M, Koschutnig K, Jauk E, Neubauer AC. Sex differences in the IQ-white matter  
835 microstructure relationship: a DTI study. *Brain and cognition*. 2014;91:71-8.
- 836 54. Svard D, Nilsson M, Lampinen B, Latt J, Sundgren PC, Stomrud E, et al. The effect of white matter  
837 hyperintensities on statistical analysis of diffusion tensor imaging in cognitively healthy elderly and  
838 prodromal Alzheimer's disease. *PLoS One*. 2017;12(9):e0185239.
- 839 55. Smith SM, Nichols TE. Threshold-free cluster enhancement: addressing problems of smoothing,  
840 threshold dependence and localisation in cluster inference. *NeuroImage*. 2009;44(1):83-98.
- 841 56. Kennedy KM, Raz N. Aging white matter and cognition: differential effects of regional variations  
842 in diffusion properties on memory, executive functions, and speed. *Neuropsychologia*. 2009;47(3):916-  
843 27.
- 844 57. Sibia F, Kehoe EG, Farrell D, Kerskens C, O'Neill D, McNulty JP, et al. Aging-Related  
845 Microstructural Alterations Along the Length of the Cingulum Bundle. *Brain Connect*. 2017;7(6):366-72.

- 846 58. Sun SW, Liang HF, Trinkaus K, Cross AH, Armstrong RC, Song SK. Noninvasive detection of  
847 cuprizone induced axonal damage and demyelination in the mouse corpus callosum. Magnetic  
848 resonance in medicine. 2006;55(2):302-8.
- 849 59. Kraus MF, Susmaras T, Caughlin BP, Walker CJ, Sweeney JA, Little DM. White matter integrity  
850 and cognition in chronic traumatic brain injury: a diffusion tensor imaging study. Brain. 2007;130(Pt  
851 10):2508-19.
- 852 60. Counsell SJ, Shen Y, Boardman JP, Larkman DJ, Kapellou O, Ward P, et al. Axial and radial  
853 diffusivity in preterm infants who have diffuse white matter changes on magnetic resonance imaging at  
854 term-equivalent age. Pediatrics. 2006;117(2):376-86.
- 855 61. Sullivan EV, Rohlfing T, Pfefferbaum A. Quantitative fiber tracking of lateral and  
856 interhemispheric white matter systems in normal aging: relations to timed performance. Neurobiology  
857 of aging. 2010;31(3):464-81.
- 858 62. Rojkova K, Volle E, Urbanski M, Humbert F, Dell'Acqua F, Thiebaut de Schotten M. Atlasing the  
859 frontal lobe connections and their variability due to age and education: a spherical deconvolution  
860 tractography study. Brain structure & function. 2015.
- 861 63. Wahl M, Li YO, Ng J, Lahue SC, Cooper SR, Sherr EH, et al. Microstructural correlations of white  
862 matter tracts in the human brain. NeuroImage. 2010;51(2):531-41.
- 863 64. Mella N, de Ribaupierre S, Eagleson R, de Ribaupierre A. Cognitive intraindividual variability and  
864 white matter integrity in aging. ScientificWorldJournal. 2013;2013:350623.
- 865 65. Schmahmann JD, Pandya DN, Wang R, Dai G, D'Arceuil HE, de Crespigny AJ, et al. Association  
866 fibre pathways of the brain: parallel observations from diffusion spectrum imaging and autoradiography.  
867 Brain. 2007;130(Pt 3):630-53.

- 868 66. Lawes IN, Barrick TR, Murugam V, Spierings N, Evans DR, Song M, et al. Atlas-based  
869 segmentation of white matter tracts of the human brain using diffusion tensor tractography and  
870 comparison with classical dissection. *NeuroImage*. 2008;39(1):62-79.
- 871 67. Wakana S, Jiang H, Nague-Poetscher LM, van Zijl PC, Mori S. Fiber tract-based atlas of human  
872 white matter anatomy. *Radiology*. 2004;230(1):77-87.
- 873 68. Reuter-Lorenz PA, Stanczak L. Differential effects of aging on the functions of the corpus  
874 callosum. *Dev Neuropsychol*. 2000;18(1):113-37.
- 875 69. Reuter-Lorenz PA, Jonides J, Smith EE, Hartley A, Miller A, Marshuetz C, et al. Age differences in  
876 the frontal lateralization of verbal and spatial working memory revealed by PET. *J Cogn Neurosci*.  
877 2000;12(1):174-87.
- 878 70. Reuter-Lorenz PA, Lustig C. Brain aging: reorganizing discoveries about the aging mind. *Current*  
879 *opinion in neurobiology*. 2005;15(2):245-51.
- 880 71. Cabeza R. Hemispheric asymmetry reduction in older adults: the HAROLD model. *Psychology*  
881 *and aging*. 2002;17(1):85-100.
- 882 72. Cabeza R, Anderson ND, Locantore JK, McIntosh AR. Aging gracefully: compensatory brain  
883 activity in high-performing older adults. *NeuroImage*. 2002;17(3):1394-402.
- 884 73. Park DC, Reuter-Lorenz P. The adaptive brain: aging and neurocognitive scaffolding. *Annual*  
885 *review of psychology*. 2009;60:173-96.
- 886 74. Gunbey HP, Ercan K, Findikoglu AS, Bulut HT, Karaoglanoglu M, Arslan H. The limbic degradation  
887 of aging brain: a quantitative analysis with diffusion tensor imaging. *ScientificWorldJournal*.  
888 2014;2014:196513.
- 889 75. Raz N, Yang Y, Dahle CL, Land S. Volume of white matter hyperintensities in healthy adults:  
890 contribution of age, vascular risk factors, and inflammation-related genetic variants. *Biochim Biophys*  
891 *Acta*. 2012;1822(3):361-9.

- 892 76. Yoshita M, Fletcher E, Harvey D, Ortega M, Martinez O, Mungas DM, et al. Extent and  
893 distribution of white matter hyperintensities in normal aging, MCI, and AD. *Neurology*.  
894 2006;67(12):2192-8.
- 895 77. Yoshiura T, Wu O, Zaheer A, Reese TG, Sorensen AG. Highly diffusion-sensitized MRI of brain:  
896 dissociation of gray and white matter. *Magnetic resonance in medicine*. 2001;45(5):734-40.
- 897 78. Burdette JH, Durden DD, Elster AD, Yen YF. High b-value diffusion-weighted MRI of normal brain.  
898 *Journal of computer assisted tomography*. 2001;25(4):515-9.
- 899 79. DeLano MC, Cooper TG, Siebert JE, Potchen MJ, Kuppusamy K. High-b-value diffusion-weighted  
900 MR imaging of adult brain: image contrast and apparent diffusion coefficient map features. *AJNR Am J*  
901 *Neuroradiol*. 2000;21(10):1830-6.
- 902 80. Jeurissen B, Leemans A, Tournier JD, Jones DK, Sijbers J. Investigating the prevalence of complex  
903 fiber configurations in white matter tissue with diffusion magnetic resonance imaging. *Hum Brain Mapp*.  
904 2013;34(11):2747-66.
- 905 81. Bach M, Laun FB, Leemans A, Tax CM, Biessels GJ, Stieltjes B, et al. Methodological  
906 considerations on tract-based spatial statistics (TBSS). *NeuroImage*. 2014;100:358-69.
- 907

## 908 **Supporting Information**

909

910 **S1Table. Total number and percentage of voxels correlated with age, and the overlap of MD,**

911 **RD and AD with age-related FA voxels.** NART and gender were included as covariates.

912

913 **S2 Table. Total number and percentage of voxels correlated with age showing specific patterns**

914 **of overlap between diffusion measure.** NART and gender were included as covariates.



## FA & RD

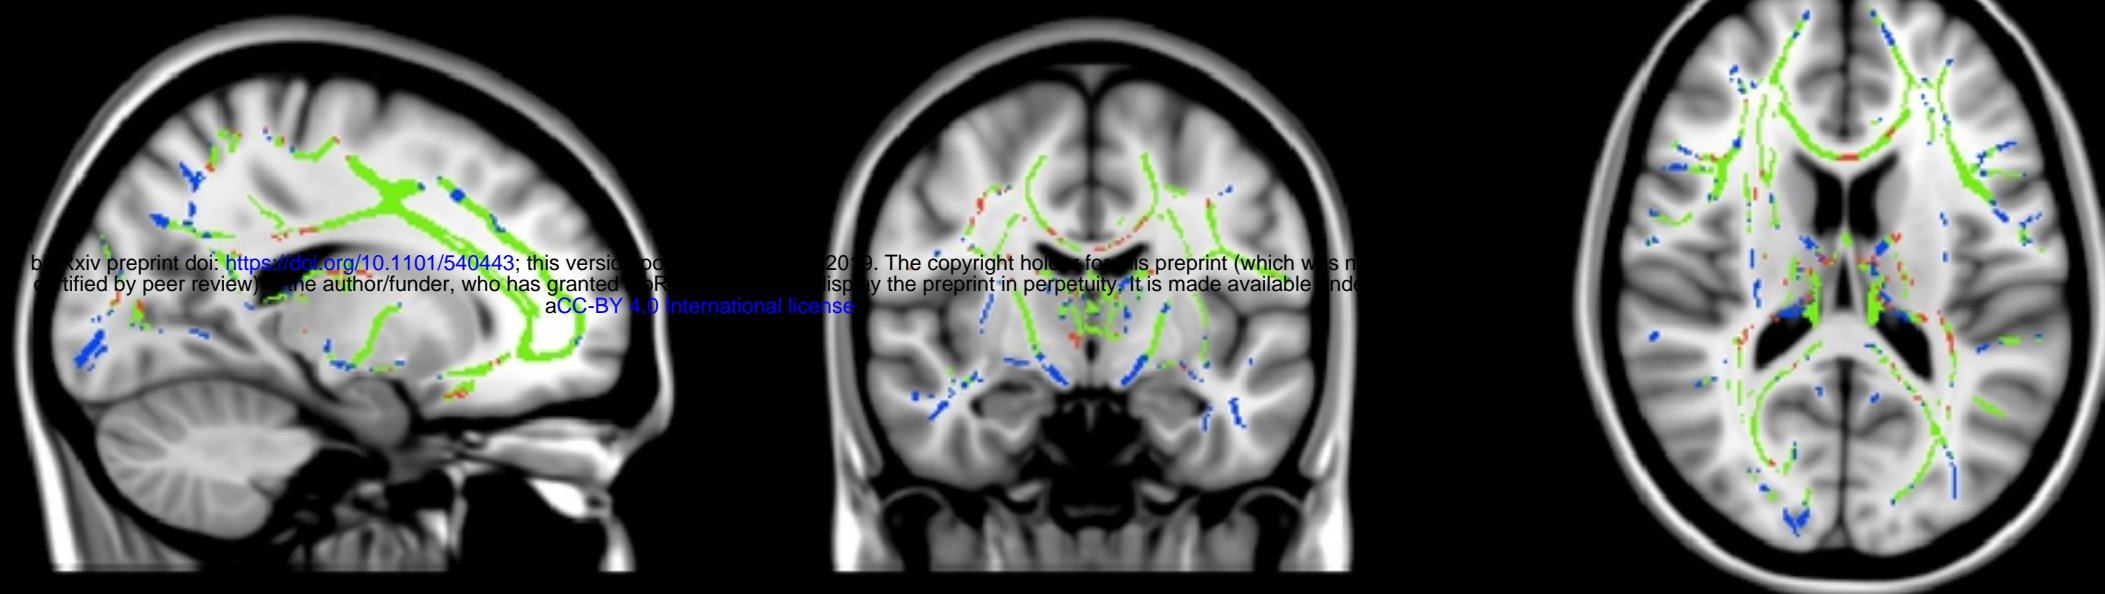

## FA & AD

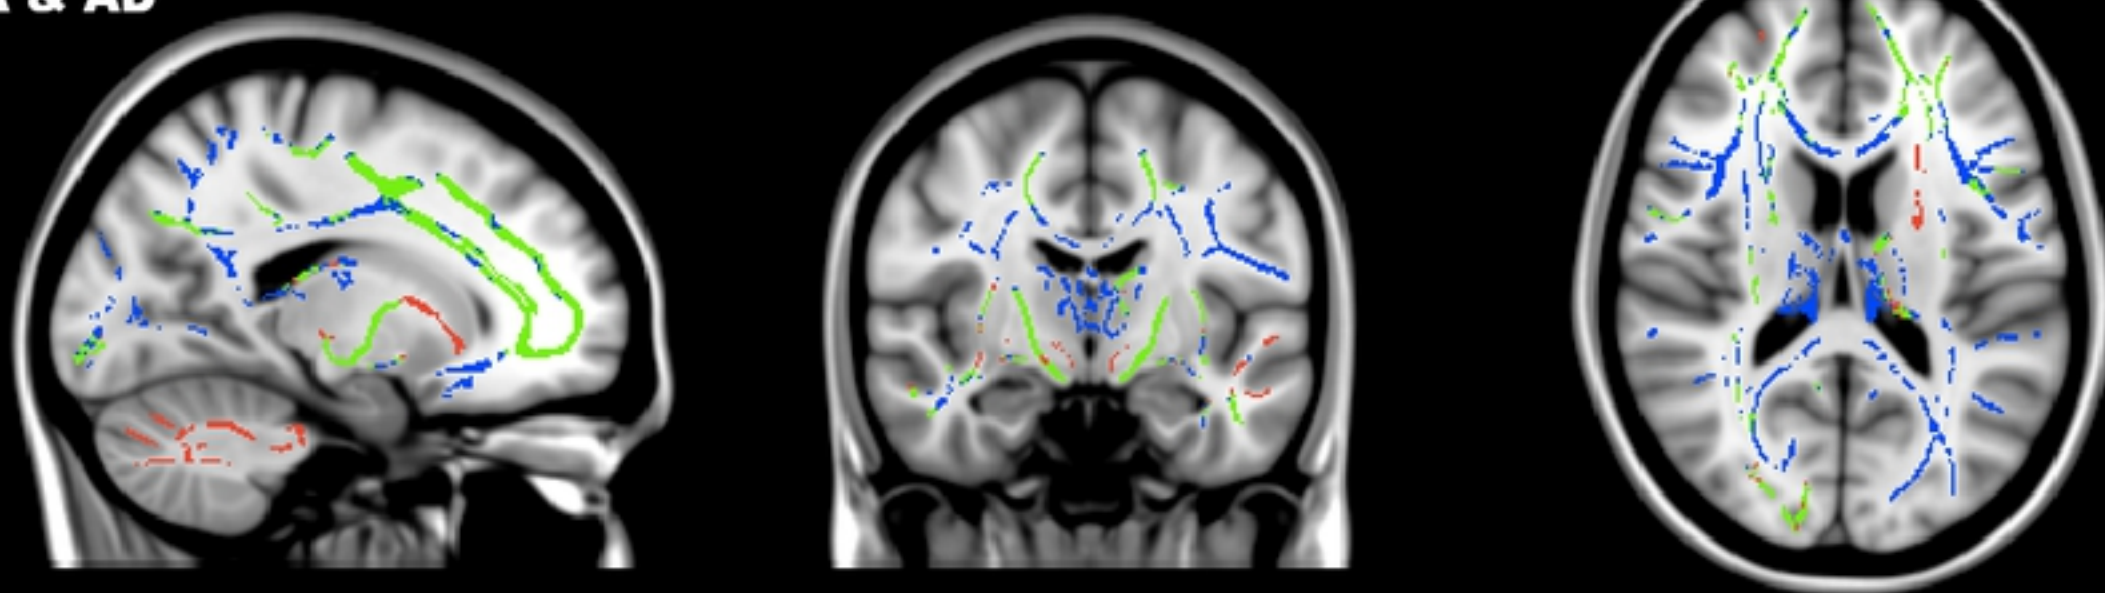

## FA & MD

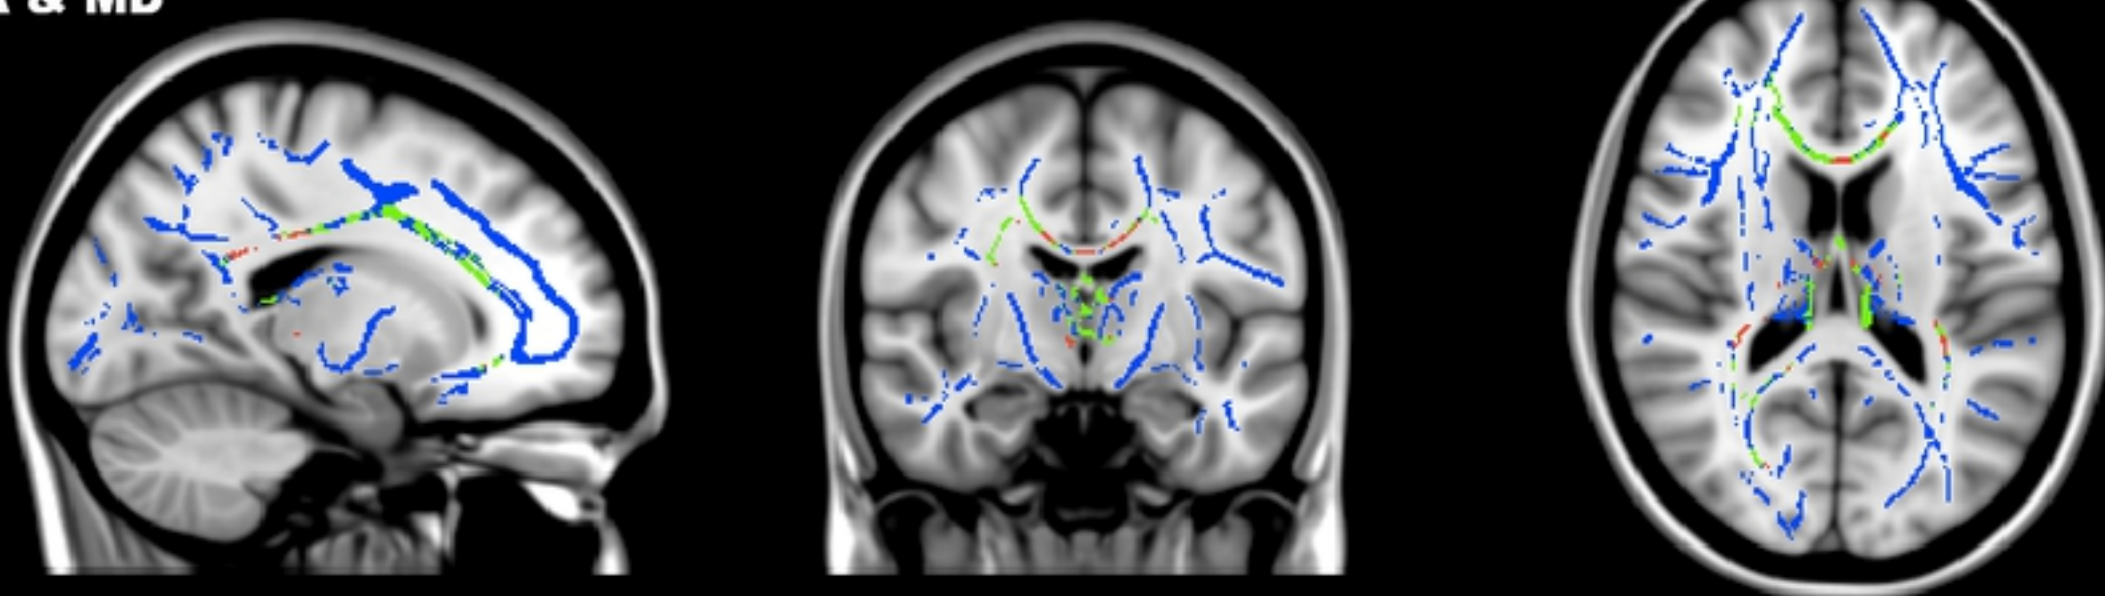

Figure 1



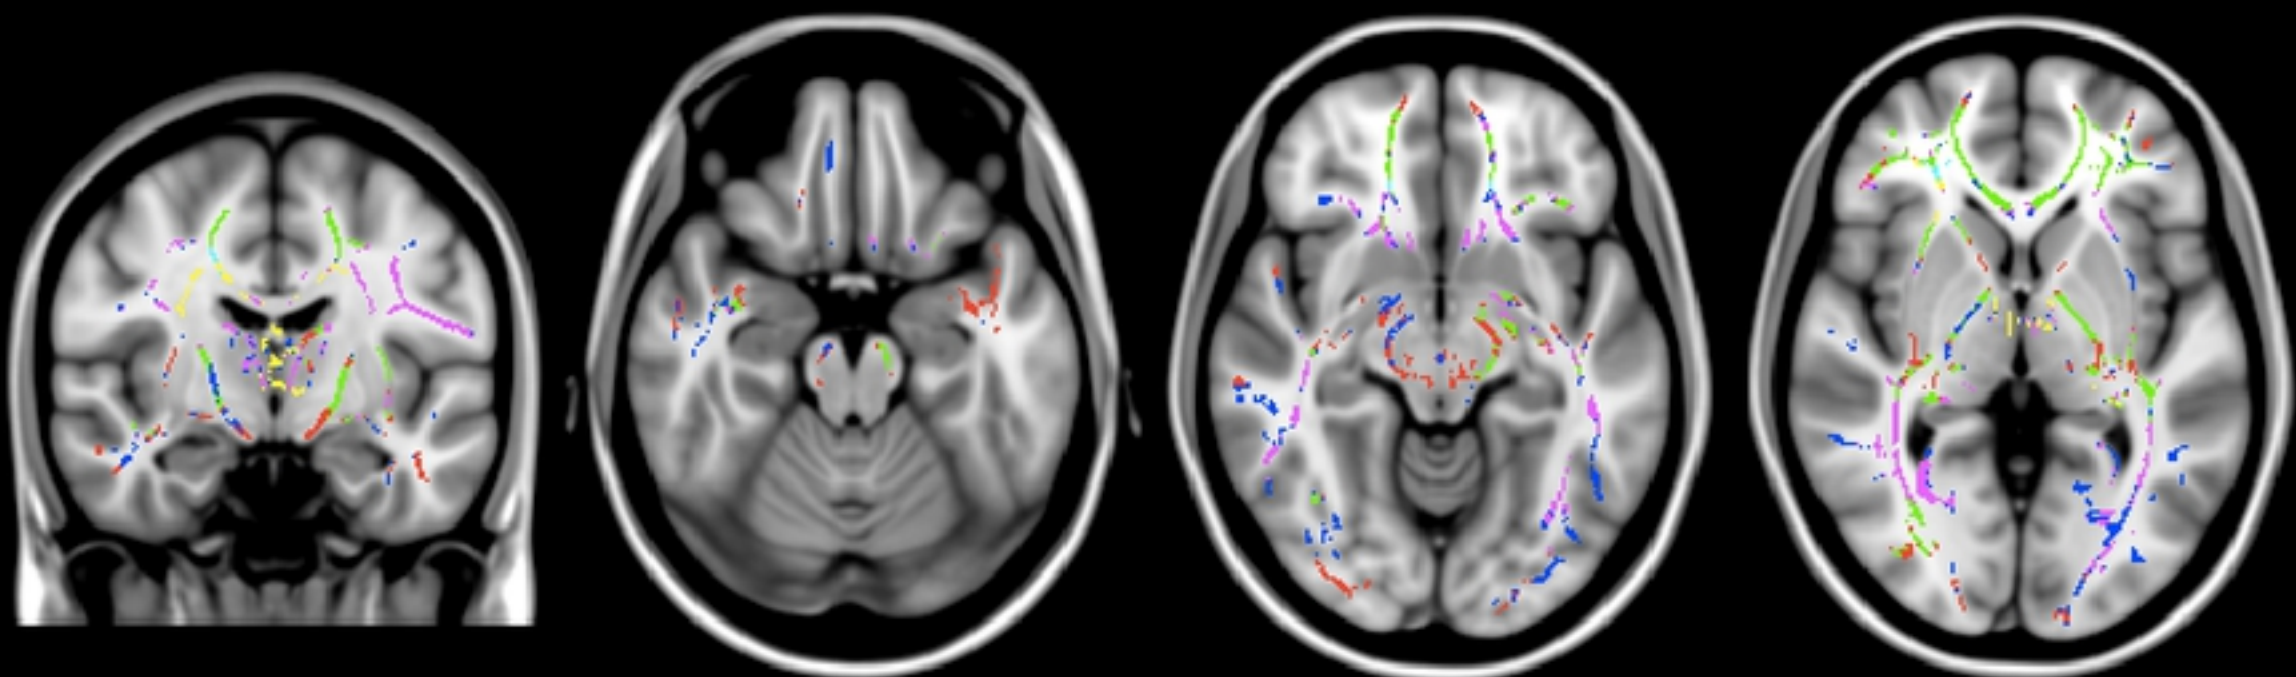

$y = -10$

$z = -20$

$z = -10$

$z = 0$

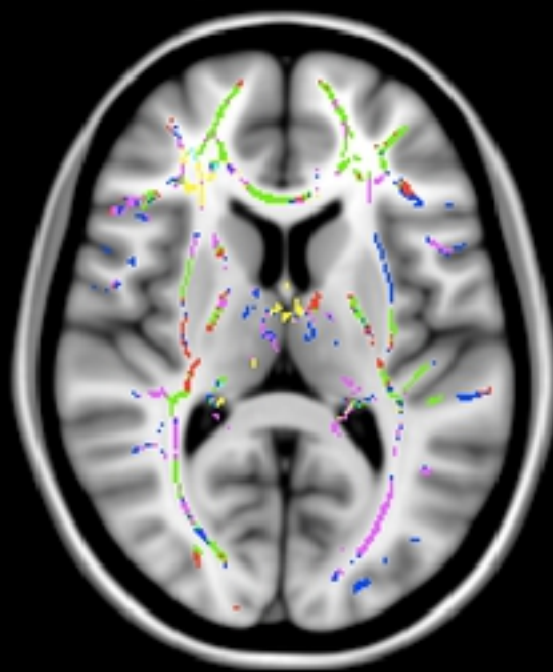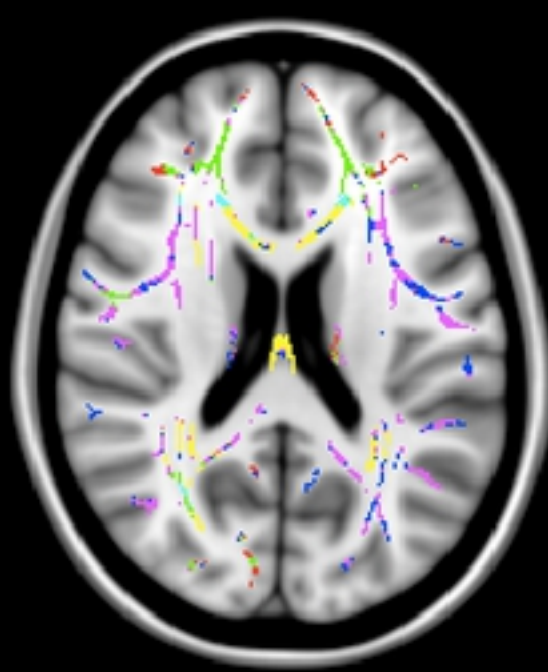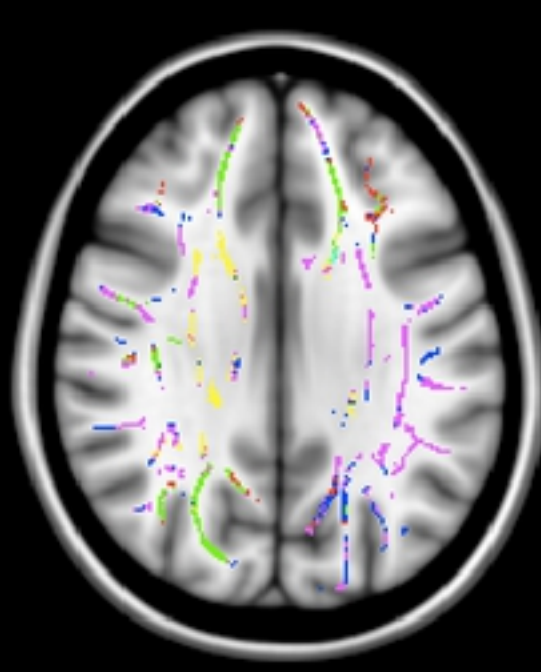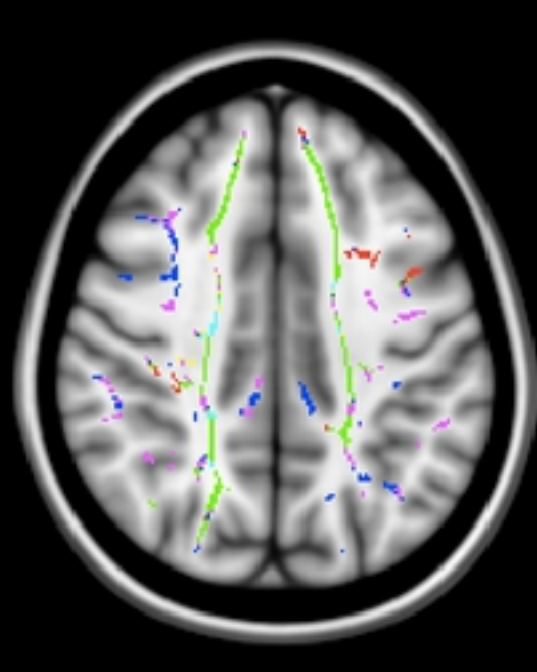

$z = 10$

$z = 20$

$z = 30$

$z = 40$

Figure2
